# Supplementary material for: Inherited NBN Mutations and Prostate Cancer Risk and Survival
Source: PubMed Central journal article supplement — Cancer Res Treat. 2018 Dec 13;51(3):1180–7. doi: 10.4143/crt.2018.532 (PMC6639207; doi:10.4143/crt.2018.532), 2018-12-13
Supplement: crt-2018-532-suppl1.pdf [file crt-2018-532-suppl1.pdf]

**S1 Table.** HR for death for selected variables for men with prostate cancer

| Variable                       | Univariate |           |         | Multivariate |           |         |
|--------------------------------|------------|-----------|---------|--------------|-----------|---------|
|                                | HR         | 95% CI    | p-value | HR           | 95% CI    | p-value |
| Age of diagnosis (yr) (trend)  | 1.04       | 1.03-1.05 | < 0.001 | 1.03         | 1.02-1.04 | < 0.001 |
| PSA level at diagnosis (ng/mL) |            |           |         |              |           |         |
| ≤ 4.0                          | 1          |           |         | 1            |           |         |
| 4.1-10                         | 1.02       | 0.73-1.41 | 0.944   | 0.93         | 0.67-1.29 | 0.658   |
| 10.1-20.0                      | 1.27       | 0.90-1.77 | 0.186   | 1.02         | 0.73-1.43 | 0.918   |
| > 20.0                         | 2.38       | 1.72-3.30 | < 0.001 | 1.64         | 1.18-2.29 | 0.004   |
| Gleason score                  |            |           |         |              |           |         |
| < 7                            | 1          |           |         | 1            |           |         |
| 7                              | 1.42       | 1.24-1.64 | < 0.001 | 1.20         | 1.04-1.39 | 0.013   |
| > 7                            | 2.29       | 1.97-2.67 | < 0.001 | 1.73         | 1.47-2.03 | < 0.001 |
| Stage                          |            |           |         |              |           |         |
| T1/2                           | 1          |           |         | 1            |           |         |
| T3                             | 1.39       | 1.20-1.62 | < 0.001 | 1.06         | 0.91-1.24 | 0.463   |
| T4                             | 2.08       | 1.71-2.54 | < 0.001 | 1.48         | 1.19-1.83 | < 0.001 |
| <i>NBN</i> 675del5 mutation    |            |           |         |              |           |         |
| Negative                       | 1          |           |         | 1            |           |         |
| Positive                       | 1.61       | 1.10-2.36 | 0.014   | 1.52         | 1.06-2.24 | 0.023   |

Multivariate analysis was performed on 2,219 patients with prostate cancer for whom all variables of interest were available. HR, hazard ratio; CI, confidence interval.
